# Supplementary material
Source: PubMed Central journal article supplement (PMC2245846)
Supplement: plntphys_pp.107.110049_1.pdf [file plntphys_pp.107.110049_1.pdf]

## Supplemental Data

The following materials are available in the online version of this article.

**Supplemental Table SI.** Rice SABATH methyltransferase genes.

**Supplemental Table SII.** Primers used for gene expression analysis of *OsSABATHs* via RT-PCR.

**Supplemental Figure S1.** *OsSABATH33* is a pseudogene. It encodes a truncated protein due to the presence of a premature stop codon at the positions of 481 to 483 of the coding sequence.

**Table SI. Rice SABATH methyl transferase genes****Table SI. Rice SABATH methyl transferase genes**

| Gene              | TIGR ID        | Chr <sup>a</sup> | Strand | Chromosome Location | Protein size |
|-------------------|----------------|------------------|--------|---------------------|--------------|
| <i>OsSABATH1</i>  | LOC_Os01g50480 | 1                | -      | 29312863 - 29311390 | 379          |
| <i>OsSABATH2</i>  | LOC_Os01g50610 | 1                | -      | 29380292 - 29377624 | 380          |
| <i>OsSABATH3</i>  | LOC_Os02g48770 | 2                | +      | 29844503 - 29846574 | 381          |
| <i>OsSABATH4</i>  | LOC_Os04g56950 | 4                | -      | 33733503 - 33731186 | 405          |
| <i>OsSABATH5</i>  | LOC_Os04g57050 | 4                | +      | 33782242 - 33786150 | 380          |
| <i>OsSABATH6</i>  | LOC_Os04g57070 | 4                | +      | 33795025 - 33796687 | 295          |
| <i>OsSABATH7</i>  | LOC_Os04g57080 | 4                | +      | 33798360 - 33800490 | 379          |
| <i>OsSABATH8</i>  | LOC_Os04g57090 | 4                | +      | 33803567 - 33805014 | 384          |
| <i>OsSABATH9</i>  | LOC_Os05g01140 | 5                | -      | 96310 - 94475       | 374          |
| <i>OsSABATH10</i> | LOC_Os06g13310 | 6                | -      | 7322202 - 7317600   | 448          |
| <i>OsSABATH11</i> | LOC_Os06g13350 | 6                | -      | 7343868 - 7341145   | 376          |
| <i>OsSABATH12</i> | LOC_Os06g13390 | 6                | -      | 7369766 - 7368205   | 352          |
| <i>OsSABATH13</i> | LOC_Os06g13460 | 6                | -      | 7407610 - 7405038   | 169          |
| <i>OsSABATH14</i> | LOC_Os06g13470 | 6                | -      | 7421148 - 7416745   | 401          |
| <i>OsSABATH15</i> | LOC_Os06g13490 | 6                | -      | 7432792 - 7428731   | 287          |
| <i>OsSABATH16</i> | LOC_Os06g13510 | 6                | +      | 7454886 - 7455585   | 109          |
| <i>OsSABATH17</i> | LOC_Os06g13520 | 6                | +      | 7458468 - 7460721   | 268          |
| <i>OsSABATH18</i> | LOC_Os06g13530 | 6                | -      | 7468414 - 7467751   | 147          |
| <i>OsSABATH19</i> | LOC_Os06g13550 | 6                | -      | 7474599 - 7473909   | 186          |
| <i>OsSABATH20</i> | LOC_Os06g13560 | 6                | -      | 7481195 - 7479074   | 375          |
| <i>OsSABATH21</i> | LOC_Os06g20630 | 6                | -      | 11889148 - 11886861 | 346          |
| <i>OsSABATH22</i> | LOC_Os06g20770 | 6                | -      | 11975246 - 11972576 | 366          |
| <i>OsSABATH23</i> | LOC_Os06g20790 | 6                | +      | 11991873 - 11983849 | 371          |
| <i>OsSABATH24</i> | LOC_Os06g20920 | 6                | -      | 12087594 - 12081450 | 339          |
| <i>OsSABATH25</i> | LOC_Os06g20960 | 6                | -      | 12117524 - 12114576 | 360          |
| <i>OsSABATH26</i> | LOC_Os06g21020 | 6                | -      | 12144412 - 12140325 | 400          |
| <i>OsSABATH27</i> | LOC_Os06g21760 | 6                | +      | 12571596 - 12573253 | 240          |
| <i>OsSABATH28</i> | LOC_Os06g21820 | 6                | +      | 12603825 - 12605643 | 350          |
| <i>OsSABATH29</i> | LOC_Os06g21830 | 6                | +      | 12607804 - 12608319 | 172          |
| <i>OsSABATH30</i> | LOC_Os06g22440 | 6                | +      | 13040901 - 13043159 | 367          |
| <i>OsSABATH31</i> | LOC_Os10g09360 | 10               | -      | 4821809 - 4821396   | 138          |
| <i>OsSABATH32</i> | LOC_Os11g15030 | 11               | +      | 8451461 - 8454568   | 388          |
| <i>OsSABATH33</i> | LOC_Os11g15040 | 11               | +      | 8461158 - 8463673   | 204          |
| <i>OsSABATH34</i> | LOC_Os11g15060 | 11               | +      | 8472066 - 8474370   | 376          |
| <i>OsSABATH35</i> | LOC_Os11g15130 | 11               | +      | 8523516 - 8525669   | 288          |
| <i>OsSABATH36</i> | LOC_Os11g15180 | 11               | +      | 8556112 - 8558343   | 366          |
| <i>OsSABATH37</i> | LOC_Os11g15300 | 11               | +      | 8643774 - 8645126   | 350          |
| <i>OsSABATH38</i> | LOC_Os11g15310 | 11               | +      | 8647797 - 8650728   | 312          |
| <i>OsSABATH39</i> | LOC_Os11g15340 | 11               | +      | 8671640 - 8673396   | 203          |
| <i>OsSABATH40</i> | LOC_Os11g15410 | 11               | +      | 8726937 - 8728351   | 266          |
| <i>OsSABATH41</i> | LOC_Os06g21720 | 6                | +      | 12554481 - 12554816 | 112          |

**Table SII.** Primers for gene expression analysis of *OsSABATHs* via RT-PCR

| Gene Name         | Forward Primer Sequences (5'-3') | Reverse Primer Sequences (5'-3') |
|-------------------|----------------------------------|----------------------------------|
| <i>OsSABATH1</i>  | ACCAACGACTTCAACACCATCTTCT        | ACCTGAGGAACAGGCTGAAGTCTCTC       |
| <i>OsSABATH2</i>  | AGGGAAAGATGTACATATCAAGCACGAG     | GTACGTCTGCACGTAGTCCATCCTGAAC     |
| <i>OsSABATH3</i>  | GAAGGCTCTGCCTCCCTACTACATT        | AAGAAGCCCATACATGTAGTCTACT        |
| <i>OsSABATH4</i>  | ACGTGTTACCTCCACCTTCTCTTT         | GGATGTTGAAGCTGTCCCTCTTCTC        |
| <i>OsSABATH5</i>  | TATGAAGTGTATTGCAGCATGTTTCGAG     | TTACACCAGTGAAAGCGAGCATAGAAT      |
| <i>OsSABATH6</i>  | ACGGATCAAGGCTACATCTATGAAGTG      | GAAAGTGAGCATAGAATATGGGGGAAG      |
| <i>OsSABATH7</i>  | CAGCTTCTATACGGCGCCATGTTCT        | CAGCGAAAGGGAACACACAATATG         |
| <i>OsSABATH8</i>  | CGTACAACAAGGAGAAGGTGTTTCGTC      | GACGTTGAAGCTGTCCATCCTCTC         |
| <i>OsSABATH9</i>  | GATAGCCTGGACTACGTGGTGTCTCGT      | CTAGATCTGCTTGGGATTGGCAGTAG       |
| <i>OsSABATH10</i> | ACTAGAGGCTAGTGAAAAATCTCTCTTG     | GACTCCAGGACTGACCTAATGAGATTAC     |
| <i>OsSABATH11</i> | CACAAAGGAGATATACTACCTGCATACC     | CATTTACATCTCCACTATATGGGTCCCTC    |
| <i>OsSABATH12</i> | AAGGTAACCAAGAAGTATACACTGGTC      | GTCCTTGTAGAACTGCTCTTGGAAATAGT    |
| <i>OsSABATH13</i> | AGGATGAGGATGTATACAATGGAAGTC      | CTATCAAAGACTCCAGCACAGATCTAA      |
| <i>OsSABATH14</i> | AAGACTACCCCTAAATCGGTGATAAAG      | GAAGAGCACGCTAGTATAGATTCTCCA      |
| <i>OsSABATH15</i> | ATCTAGTGGTCAGATGCTACTCACTTTC     | ATAGCACTCCATCTCCATATGTTCTTGG     |
| <i>OsSABATH16</i> | GACCGAATACACTAGTCTTCACTCTGA      | ATGTAGGGAATACGATGAATGGAAGAG      |
| <i>OsSABATH17</i> | GTGACTACACCTGAAGAAGTATAAAGC      | ATGAGTAGCAAACAACCTCTCCATAAC      |
| <i>OsSABATH18</i> | AGTTGTACCAGGATCAGTTCAGAAG        | ATGACAAGACTATGACCGAGTACTTCAC     |
| <i>OsSABATH19</i> | AAACTATGCCAACAACTCTAGGCTTC       | AGCCCAGAGATATAGAATGGAGGTAAC      |
| <i>OsSABATH20</i> | AGTAGCACTGCCTCCATTCTATATCTCT     | ATACAGTGGTAGGTTGAATGACTCCAG      |
| <i>OsSABATH21</i> | AGGACTTTTCAATTGTTCTCTCACACT      | GTACATAGCCCTTCTTTCTCAAGATG       |
| <i>OsSABATH22</i> | CTACCTGGCAATGACTTTAACTACGCTCT    | GAACAGTGAGAAGTCTCTTTGAACTT       |
| <i>OsSABATH23</i> | AGAAAAGCTTGACTCCTTCTACATTCC      | TCACATCGCTCTAGTAAGAGACAAAACA     |
| <i>OsSABATH24</i> | CTCCAGATGATCTTAAGGAGGGTAAAA      | GTGCGTAGAGTGGTATGTAGAAGGAAT      |
| <i>OsSABATH25</i> | GTCATCTATGAGAGGCTTTTCACTTTC      | GCTACAGATACCCTTTCCATACTTGAG      |
| <i>OsSABATH26</i> | CATGGTACCTGGGTCATTTTATGATAG      | GTGCATAGATAGGTATGTGGAATGTGTC     |
| <i>OsSABATH27</i> | GGTGGGAGTATGGACAGCTTCAAC         | CTCTCCATCCGGACAAATAGCTTG         |
| <i>OsSABATH28</i> | GGAGTCCAGTTACCTCAAAAACAGTAA      | AAGGTGGAGGTGAACACGTCGATAGAT      |
| <i>OsSABATH29</i> | GGGACGATGGACAGCTTCAACAT          | GTGGAAGTGGACCCCATCTCGT           |
| <i>OsSABATH30</i> | AGCTCTGCGTACTCCTCAACGATCT        | AGTCTACAGCCCTCATCTTCAGAAAC       |
| <i>OsSABATH31</i> | AGATTTGGCGTGGCTGACTTGGACT        | AGGCTGAAAGAAGAGCAGACGAGAT        |
| <i>OsSABATH32</i> | GATCCAATTCTTTCTCAATGACCTACC      | CTGAATACATCTGTGCTATTCTCCCTA      |
| <i>OsSABATH33</i> | AAGGAGAAGCTGGACTCTTTCAACATT      | GCATACCATGAGCGCACTTTACTCTAT      |
| <i>OsSABATH34</i> | AGGACCATAACAACACTATCAAGGAGAG     | ATCTCATTTGGAGGAACGTGAGAAAT       |
| <i>OsSABATH35</i> | GGTGACAAAGCTCTACCAAAATCAGTT      | TCATCGAGTATAGAATCCCCGAAAT        |
| <i>OsSABATH36</i> | GGGTACAACCTCCTCCGTACTATGTC       | CTTGTGAAAGCAACTCGAAAATAGTGG      |
| <i>OsSABATH37</i> | GGCAACATTTATATAGGGGTGACTACAC     | GCTTTGTTGTACTAGCTGCTTCAGTTC      |
| <i>OsSABATH38</i> | GAGGTCCAGATATTTCTCAATGACCTAC     | CTCAAACCTGGTCCAAGTAGAGTTTCTC     |
| <i>OsSABATH39</i> | AAGAGAGCCAGTTGTTTCGACATCATAG     | AGTGACACAGAAATGGCCATAATGC        |
| <i>OsSABATH40</i> | CCGAGGTATAGCTTACAAGGAGGTATTT     | CACTGCAAAGAGGTCATCGATTATT        |
| <i>OsSABATH41</i> | ATGGACAGCTTCAACATCCCGTCGTA       | CTCTCCATCCGACAAAACAGCTCAT        |

M K I E R D F H M M K G D S E F S Y A K  
1 ATGAAGATCG AGCGAGATTT CCACATGATG AAAGGGGACA GTGAGTTCAG TTATGCCAAG  
N S R I Q K R V V L A A K P I V E K A V  
61 AATTCAAGGA TCCAAAAAAG AGTTGTCTTT GCTGCCAAAC CAATAGTTGA GAAAGCTGTA  
R E V C I D L H P Q S M V I A D L G C S  
121 CGGGAAGTGT GCATAGATCT TCATCCTCAA TCAATGGTCA TTGCTGACCT TGGCTGCTCC  
F G A N T L L F I S E V I T T I Y E D Y  
181 TTCGGTGCAA ACACACTCCT CTTTCTCTCT GAGGTGATCA CCACAATATA TGAGGACTAT  
N N T I K E S P M E V Q F F L N D L P S  
241 AACAAACCCA TCAAGGAGAG CCCCATGGAG GTCCAGTTCT TCCTCAATGA CCTACCAAGC  
N D F N H I F Q S L E Q F E Q L I T Q Y  
301 AATGACTTTA ACCACATCTT CCAATCACTA GAGCAGTTTC AGCAGTTGAT AACGCAATAT  
C A C K G L Q P P P H F V A G L P G S F  
361 TGGCCTTGCA AAGGGTTACA ACCTCCCCCG CACTTTGTTC CAGGCCTGCC AGGTTCCCTC  
Y T R L F P C N S V H L F H S S M S V M  
421 TACACTAGAC TCTTCCCTTG TAATAGCGTC CATCTCTTCC ATTCTCCCAT GAGCGTCATG  
\*  
481 TGA CTCTCTC AGGTTCTCGA GCAGCTTGAT GGCAGCATGA ATGAGGGGAA CATTACATA  
541 GGAGCGACTA CACCACCATC CGTGGCAAAG CTCTACCAA ATCAGTTTGA GAAAGACTTC  
601 TCACGGTTCC TCCAGATGAG ATGCATGGAG ATTGTGCCCC GAGGCCGGAT GGTGCTGACG  
661 GTTGCTGGGA GGAAGAGCAA AGATGTGTTC AATGCAGGAG GGACGACCAC GATATTTGAT  
721 TTGCTTTTCA AAGGGCTACG TATTCTTGTT GCTGAGGGTC GTGTTGCCAA GGAGAAGCTG  
781 GACTCTTTCA ACATTCCAGT GTACTGCCCT TCAGCTGATG AGCTGACGCA GCTGGTGCAG  
841 CAGTGCGAGC TGCTTGACAT AAGTGACATT CAACTCTTCC AGATGGATGA GAACCGCATG  
901 CATGACTCGG AGCAAGCAGA GGGCACCACC GCCGCTCACA CAGCGGGACA GAGCATGTCT  
961 GCAACTCTAA GGGTGGCGAC AGAGTCCCTG GTAGCAAGCC ATTTTGGGGA GGACATACTC  
1021 GAGGAGATCT TCACGGTGTT TGCACGTAAT TTCACTAGTT ATATTGAGAG TGAGGTTGAG  
1081 AAAAGTGGA TCACCATCAT CACACTGTAC TTGCAGGCAA AACACTAG

**Figure S1.**
